# Supplementary material for: High color stability and CRI (>80) fluorescent white organic light-emitting diode based pure emission of exciplexes by employing merely complementary colors
Source: Royal Society of Chemistry journal article supplement (doi:10.1039/c7tc05196d), 2017-12-07
Supplement: c7tc05196d1.pdf [file c7tc05196d1.pdf]

## Supporting Information

### **High color stability and CRI (>80) fluorescent white organic light-emitting diodes based pure emission of exciplex by employing merely complementary colors**

Bo Zhao,<sup>a,b\*</sup> Heng Zhang,<sup>a,b</sup> Yanqin Miao,<sup>a,b</sup> Ziqi Wang,<sup>a,b</sup> Long Gao,<sup>a,b</sup> Hua Wang,<sup>a,b\*</sup> Yuying Hao,<sup>c</sup> Wenlian Li<sup>d</sup>

<sup>a</sup>Key Laboratory of Interface Science and Engineering in Advanced Materials, Ministry of Education, Taiyuan University of Technology, Taiyuan 030024, P. R. China

<sup>b</sup>Research Center of Advanced Materials Science and Technology, Taiyuan University of Technology, Taiyuan 030024, P. R. China

<sup>c</sup>Key Laboratory of Advanced Transducers and Intelligent Control System of Ministry of Education, College of Physics and Optoelectronics, Taiyuan University of Technology, Taiyuan 030024, P. R. China

<sup>d</sup>State Key Laboratory of Luminescence and Applications, Changchun Institute of Optics, Fine Mechanics, and Physics, Chinese Academy of Sciences, Changchun 130033, PR China

### **Corresponding Authors**

\*E-mail: [zhaobo01@tyut.edu.cn](mailto:zhaobo01@tyut.edu.cn) and [wanghua001@tyut.edu.cn](mailto:wanghua001@tyut.edu.cn)

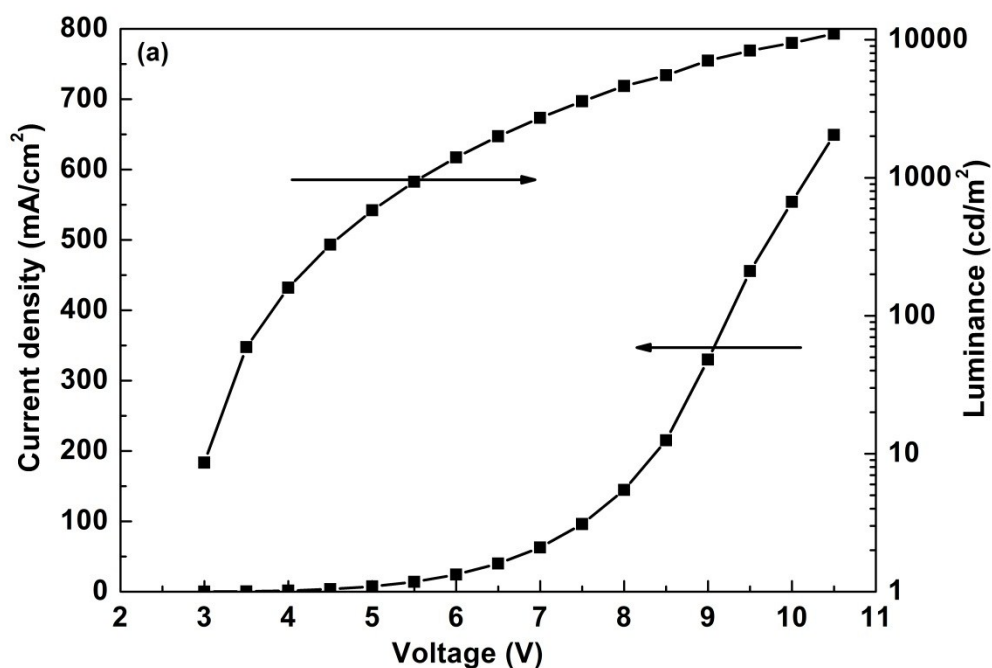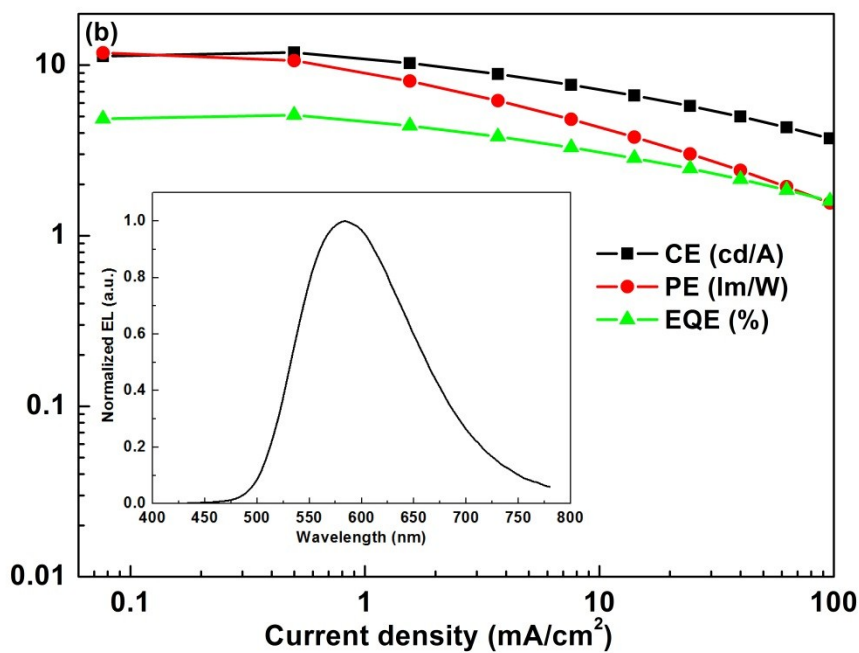

Figure S1 The EL performances of individual orange exciplex devices with the structure of ITO/MoO<sub>3</sub> (3 nm)/TAPC (25 nm)/TAPC:PO-T2T (15 nm)/PO-T2T (40 nm)/LiF (1 nm)/Al.
